# Supplementary material for: A Comparative Analysis of Bioactive Phytochemicals in Cynanchum viminale (L.) L. and Pergularia daemia (Forssk.) Chiov. from Saudi Arabian Folk Medicine
Source: Research Square preprint supplement (doi:10.21203/rs.3.rs-7674030/v1), 2025-10-08
Supplement: Supplementary file 1 [file e4b68ec9a157841ed8d97376.docx]

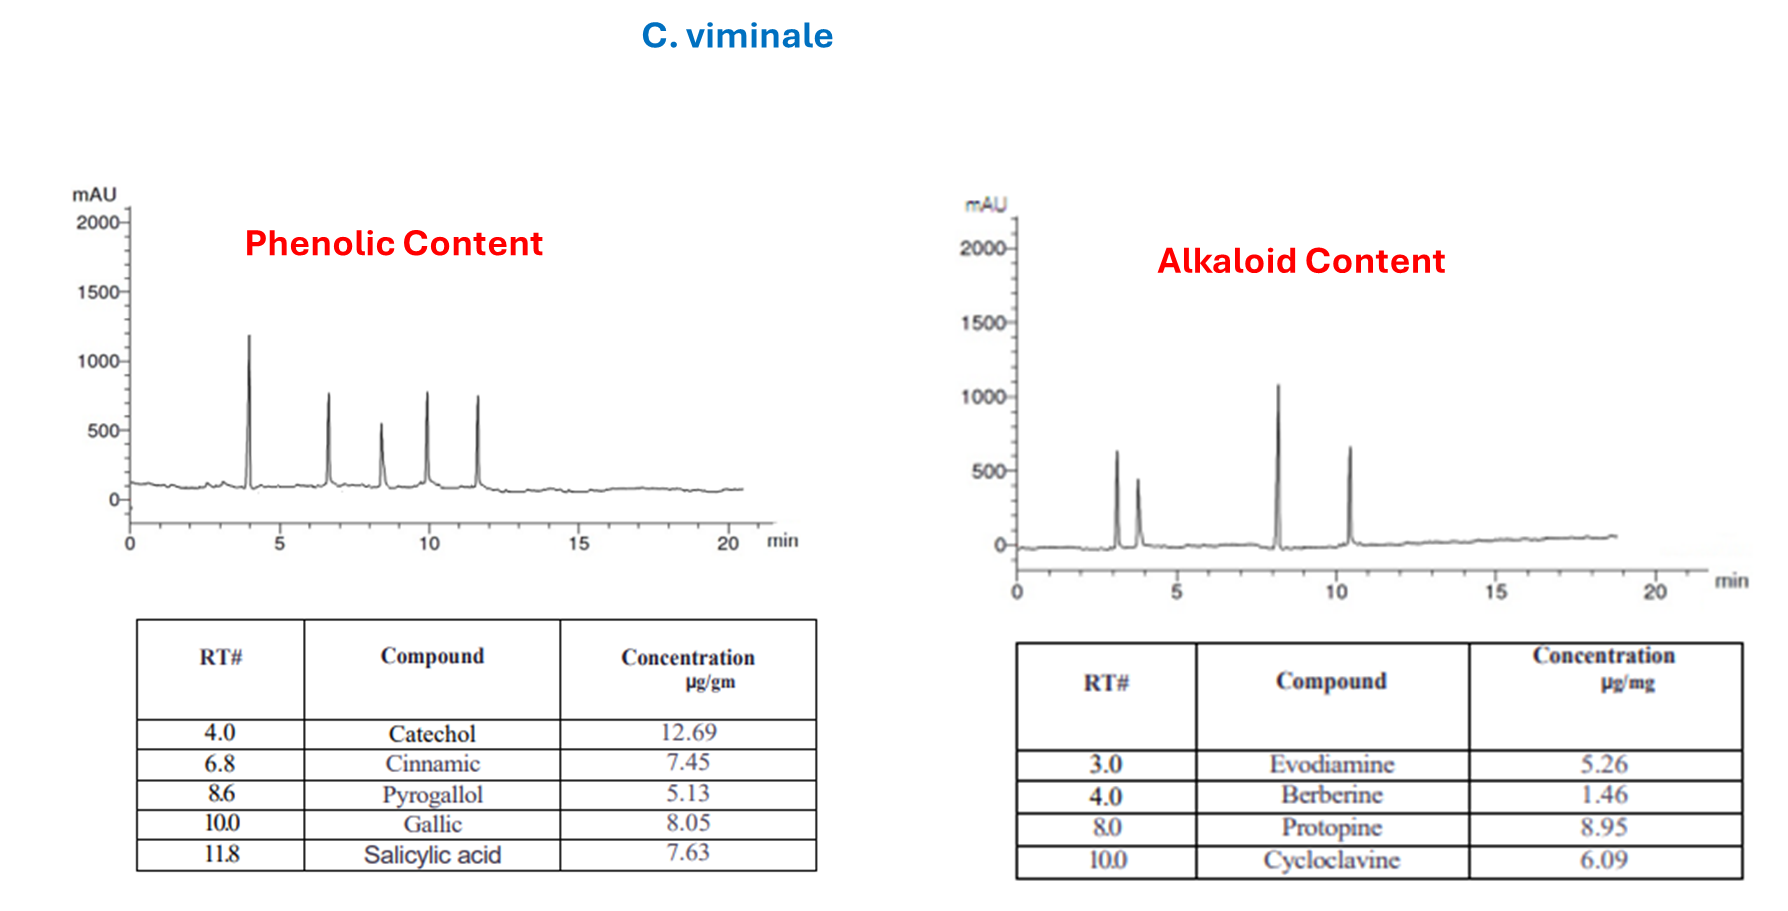


Figure S-1**:** HPLC Chromatogram of alkaloid and phenolic composition of *C. viminale* methanol extracts.


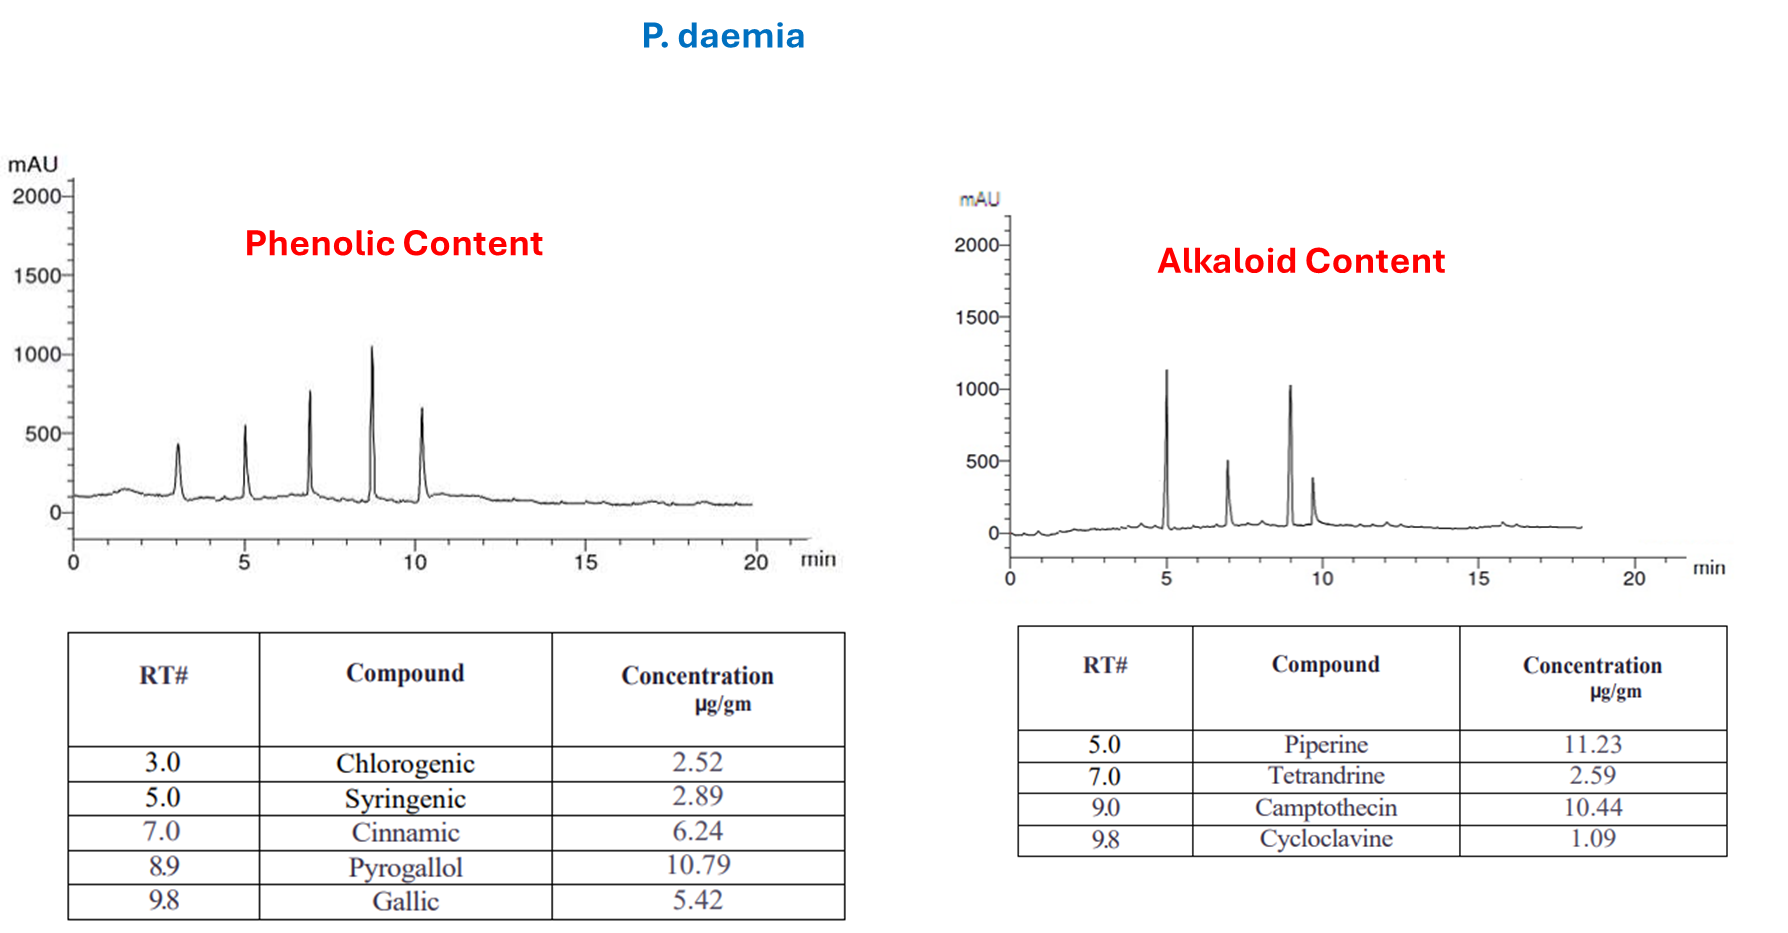


Figure S-2**:** HPLC Chromatogram of alkaloid and phenolic composition of  *P. daemia* methanol extracts

Table S-1: Evaluation of antioxidant of *alkaloid and phenolic composition of C. viminale and P. daemia methanol extracts*

using **DPPH** radicalscavenging

| **Sample**  **conc. (µg/ml)** | ***C. viminale*** | | | | | ***P. daemia*** | | | | |
| --- | --- | --- | --- | --- | --- | --- | --- | --- | --- | --- |
| **3 Readings** | | | **Mean** | **S.D. (±)** | **3 Readings** | | | **Mean** | **S.D. (±)** |
|  | ***C. viminale*** | | | | | ***P. daemia*** | | | | |
| **1000** | **95.14** | **94.73** | **94.73** | **94.87** | **0.24** | **95.60** | **96.03** | **94.96** | **95.53** | **0.54** |
| **500** | **90.13** | **90.95** | **89.02** | **90.03** | **0.97** | **93.41** | **93.41** | **92.57** | **93.13** | **0.48** |
| **250** | **87.49** | **85.14** | **85.14** | **85.92** | **1.36** | **90.58** | **89.06** | **89.06** | **89.57** | **0.88** |
| **125** | **75.21** | **73.14** | **76.09** | **74.81** | **1.51** | **84.79** | **81.75** | **80.23** | **82.26** | **2.32** |
| **62.5** | **60.08** | **62.45** | **59.17** | **60.57** | **1.69** | **66.43** | **64.90** | **67.29** | **66.21** | **1.21** |
| **31.25** | **38.94** | **41.32** | **40.26** | **40.17** | **1.19** | **43.56** | **45.12** | **40.62** | **43.10** | **2.28** |
| **15.6** | **23.85** | **20.96** | **25.13** | **23.31** | **2.14** | **27.68** | **26.84** | **24.93** | **26.48** | **1.41** |
| **7.8** | **9.37** | **9.37** | **10.41** | **9.72** | **0.60** | **13.14** | **15.09** | **13.14** | **13.79** | **1.13** |
| **3.9** | **5.16** | **4.83** | **5.72** | **5.24** | **0.45** | **9.73** | **8.62** | **8.62** | **8.99** | **0.64** |
| **2** | **3.28** | **2.41** | **2.95** | **2.88** | **0.44** | **6.44** | **5.96** | **5.40** | **5.93** | **0.52** |
| **1** | **1.73** | **1.08** | **1.39** | **1.40** | **0.33** | **3.85** | **3.04** | **2.79** | **3.23** | **0.55** |
| **0.5** | **0.92** | **0.82** | **0.64** | **0.79** | **0.14** | **1.49** | **1.25** | **0.88** | **1.21** | **0.31** |
| **0** | **0** | **0** | **0** | **0** | **0** | **0** | **0** | **0** | **0** | **0** |
|  | **IC50** | | | | | **IC50** | | | | |
|  | **47.60** | **44.09** | **47.35** | **46.34** | **1.96** | **40.05** | **38.96** | **42.24** | **40.42** | **1.67** |

Table S-2: Evaluation of antioxidant of *alkaloid and phenolic composition of C. viminale and P. daemia methanol extracts*

using **ABT** radicalscavenging

| **Sample**  **conc. (µg/ml)** | ***C. viminale*** | | | | | ***P. daemia*** | | | | |
| --- | --- | --- | --- | --- | --- | --- | --- | --- | --- | --- |
| **3 Readings** | | | **Mean** | **S.D. (±)** | **3 Readings** | | | **Mean** | **S.D. (±)** |
|  | ***C. viminale*** | | | | | ***P. daemia*** | | | | |
| **1000** | **91.46** | **90.63** | **89.42** | **90.50** | **1.03** | **93.46** | **92.75** | **92.97** | **93.06** | **0.36** |
| **500** | **80.29** | **76.82** | **79.40** | **78.84** | **1.80** | **88.19** | **86.21** | **87.08** | **87.16** | **0.99** |
| **250** | **63.74** | **60.42** | **64.53** | **62.90** | **2.18** | **71.95** | **74.92** | **75.46** | **74.11** | **1.89** |
| **125** | **47.31** | **45.19** | **44.96** | **45.82** | **1.30** | **58.42** | **61.34** | **62.78** | **60.85** | **2.22** |
| **62.5** | **30.46** | **31.23** | **28.62** | **30.10** | **1.34** | **45.17** | **43.89** | **40.91** | **43.32** | **2.19** |
| **31.25** | **19.73** | **20.59** | **18.61** | **19.64** | **0.99** | **31.42** | **30.69** | **28.97** | **30.36** | **1.26** |
| **15.6** | **9.84** | **11.47** | **10.25** | **10.52** | **0.85** | **20.61** | **18.43** | **19.56** | **19.53** | **1.09** |
| **7.8** | **6.25** | **5.82** | **6.74** | **6.27** | **0.46** | **9.28** | **8.65** | **9.40** | **9.11** | **0.40** |
| **3.9** | **3.04** | **3.76** | **4.29** | **3.70** | **0.63** | **4.59** | **4.06** | **4.32** | **4.32** | **0.27** |
| **2** | **1.73** | **2.09** | **1.64** | **1.82** | **0.24** | **2.34** | **1.87** | **1.87** | **2.03** | **0.27** |
| **1** | **0.68** | **0.84** | **0.79** | **0.77** | **0.08** | **0.87** | **0.92** | **1.08** | **0.96** | **0.11** |
| **0.5** | **0.29** | **0.24** | **0.36** | **0.30** | **0.06** | **0.59** | **0.23** | **0.41** | **0.41** | **0.18** |
| **0** | **0** | **0** | **0** | **0** | **0** | **0** | **0** | **0** | **0** | **0** |
|  | **IC50** | | | | | **IC50** | | | | |
|  | **145.47** | **164.48** | **157.19** | **155.71** | **9.59** | **85.28** | **84.38** | **88.48** | **86.05** | **2.15** |

Table S-3: Evaluation of antioxidant of *alkaloid and phenolic composition of C. viminale and P. daemia methanol extracts*

using **FRAP** radicalscavenging

| **Sample**  **conc. (µg/ml)** | ***C. viminale*** | | | | | ***P. daemia*** | | | | |
| --- | --- | --- | --- | --- | --- | --- | --- | --- | --- | --- |
| **3 Readings** | | | **Mean** | **S.D. (±)** | **3 Readings** | | | **Mean** | **S.D. (±)** |
|  | ***C. viminale*** | | | | | ***P. daemia*** | | | | |
| **1000** | **90.23** | **88.69** | **89.51** | **89.48** | **0.77** | **93.25** | **91.86** | **92.19** | **92.43** | **0.73** |
| **500** | **74.51** | **73.26** | **76.24** | **74.67** | **1.50** | **85.60** | **84.17** | **82.46** | **84.08** | **1.57** |
| **250** | **56.28** | **55.91** | **57.13** | **56.44** | **0.63** | **76.93** | **75.46** | **73.15** | **75.18** | **1.91** |
| **125** | **41.39** | **38.64** | **36.90** | **38.98** | **2.26** | **57.41** | **58.23** | **61.42** | **59.02** | **2.12** |
| **62.5** | **26.78** | **25.16** | **23.84** | **25.26** | **1.47** | **39.28** | **42.67** | **45.29** | **42.41** | **3.01** |
| **31.25** | **17.09** | **14.73** | **11.95** | **14.59** | **2.57** | **30.68** | **31.29** | **30.68** | **30.88** | **0.35** |
| **15.6** | **10.42** | **9.56** | **8.23** | **9.40** | **1.10** | **22.51** | **23.86** | **21.74** | **22.70** | **1.07** |
| **7.8** | **4.32** | **4.79** | **4.06** | **4.39** | **0.37** | **14.29** | **13.72** | **15.46** | **14.49** | **0.89** |
| **3.9** | **1.87** | **2.32** | **2.35** | **2.18** | **0.27** | **6.84** | **6.84** | **7.42** | **7.03** | **0.33** |
| **2** | **0.95** | **1.23** | **0.95** | **1.04** | **0.16** | **3.12** | **3.46** | **3.79** | **3.46** | **0.34** |
| **1** | **0.73** | **0.91** | **0.64** | **0.76** | **0.14** | **0.95** | **1.35** | **1.82** | **1.37** | **0.44** |
| **0.5** | **0.28** | **0.43** | **0.28** | **0.33** | **0.09** | **0.54** | **0.62** | **0.97** | **0.71** | **0.23** |
| **0** | **0** | **0** | **0** | **0** | **0** | **0** | **0** | **0** | **0** | **0** |
|  | **IC50** | | | | | **IC50** | | | | |
|  | **197.28** | **207.22** | **205.94** | **203.48** | **5.41** | **99.46** | **91.94** | **80.75** | **90.72** | **9.41** |

Table S-4: Evaluation of antioxidant of *alkaloid and phenolic composition of C. viminale and P. daemia methanol extracts*

using **H2O2** radicalscavenging

| **Sample**  **conc. (µg/ml)** | ***C. viminale*** | | | | | ***P. daemia*** | | | | |
| --- | --- | --- | --- | --- | --- | --- | --- | --- | --- | --- |
| **3 Readings** | | | **Mean** | **S.D. (±)** | **3 Readings** | | | **Mean** | **S.D. (±)** |
|  | ***C. viminale*** | | | | | ***P. daemia*** | | | | |
| **1000** | **92.59** | **90.78** | **92.59** | **91.99** | **1.05** | **94.21** | **93.85** | **92.98** | **93.68** | **0.63** |
| **500** | **78.14** | **74.26** | **77.08** | **76.49** | **2.01** | **88.59** | **87.04** | **85.71** | **87.11** | **1.44** |
| **250** | **56.31** | **59.24** | **61.37** | **58.97** | **2.54** | **79.24** | **74.93** | **76.48** | **76.88** | **2.18** |
| **125** | **36.62** | **45.13** | **42.39** | **41.38** | **4.34** | **64.92** | **61.88** | **63.20** | **63.33** | **1.52** |
| **62.5** | **17.45** | **20.91** | **25.32** | **21.23** | **3.94** | **49.23** | **46.70** | **48.19** | **48.04** | **1.27** |
| **31.25** | **8.93** | **12.85** | **11.47** | **11.08** | **1.99** | **37.51** | **32.14** | **34.75** | **34.80** | **2.69** |
| **15.6** | **3.76** | **6.04** | **5.21** | **5.00** | **1.15** | **24.98** | **20.63** | **21.56** | **22.39** | **2.29** |
| **7.8** | **1.58** | **2.37** | **2.37** | **2.11** | **0.46** | **13.85** | **11.47** | **11.47** | **12.26** | **1.37** |
| **3.9** | **0.72** | **0.94** | **0.89** | **0.85** | **0.12** | **6.76** | **5.29** | **5.83** | **5.96** | **0.74** |
| **2** | **0.29** | **0.35** | **0.41** | **0.35** | **0.06** | **3.82** | **3.24** | **2.19** | **3.08** | **0.83** |
| **1** | **0.13** | **0.21** | **0.17** | **0.17** | **0.04** | **1.59** | **1.16** | **0.98** | **1.24** | **0.31** |
| **0.5** | **0.05** | **0.07** | **0.04** | **0.05** | **0.02** | **0.93** | **0.54** | **0.54** | **0.67** | **0.23** |
| **0** | **0** | **0** | **0** | **0** | **0** | **0** | **0** | **0** | **0** | **0** |
|  | **IC50** | | | | | **IC50** | | | | |
|  | **209.94** | **168.14** | **175.12** | **184.40** | **22.39** | **65.57** | **76.09** | **70.04** | **70.56** | **5.28** |

Table S-5: Evaluation of antioxidant of *alkaloid and phenolic composition of C. viminale and P. daemia methanol extracts*

cytotoxicity against HepG-2 cell line

| **Sample**  **conc. (µg/ml)** | ***C. viminale*** | | | | | ***P. daemia*** | | | | |
| --- | --- | --- | --- | --- | --- | --- | --- | --- | --- | --- |
| **3 Readings** | | | **Mean** | **S.D. (±)** | **3 Readings** | | | **Mean** | **S.D. (±)** |
|  | ***C. viminale*** | | | | | ***P. daemia*** | | | | |
| **500** | **4.03** | **3.17** | **4.29** | **3.83** | **96.17** | **13.49** | **15.24** | **16.38** | **15.04** | **84.96** |
| **250** | **8.61** | **8.03** | **9.78** | **8.81** | **91.19** | **31.74** | **34.68** | **35.26** | **33.89** | **66.11** |
| **125** | **13.75** | **14.65** | **15.89** | **14.76** | **85.24** | **72.95** | **75.03** | **73.17** | **73.72** | **26.28** |
| **62.5** | **27.43** | **30.27** | **26.14** | **27.95** | **72.05** | **94.17** | **89.46** | **90.24** | **91.29** | **8.71** |
| **31.25** | **40.78** | **42.31** | **40.78** | **41.29** | **58.71** | **98.72** | **98.72** | **97.68** | **98.37** | **1.63** |
| **15.6** | **62.34** | **57.49** | **65.12** | **61.65** | **38.35** | **100** | **100** | **99.54** | **99.85** | **0.15** |
| **7.8** | **79.02** | **76.36** | **75.28** | **76.89** | **23.11** | **100** | **100** | **100** | **100** | **0** |
| **3.9** | **87.41** | **84.93** | **86.06** | **86.13** | **13.87** | **100** | **100** | **100** | **100** | **0** |
| **2** | **95.23** | **93.18** | **94.81** | **94.41** | **5.59** | **100** | **100** | **100** | **100** | **0** |
| **1** | **98.54** | **98.54** | **99.73** | **98.94** | **1.06** | **100** | **100** | **100** | **100** | **0** |
| **0.5** | **100** | **100** | **100** | **100** | **0** | **100** | **100** | **100** | **100** | **0** |
| **0.25** | **100** | **100** | **100** | **100** | **0** | **100** | **100** | **100** | **100** | **0** |
| **0** | **100** | **100** | **100** | **100** | **0** | **100** | **100** | **100** | **100** | **0** |
|  | **IC50** | | | | | **IC50** | | | | |
|  | **24.53** | **23.30** | **25.29** | **24.37** | **1.01** | **194.61** | **202.54** | **201.40** | **199.52** | **4.29** |

Table S-6: Evaluation of antioxidant of *alkaloid and phenolic composition of C. viminale and P. daemia methanol extracts*

cytotoxicity against MCF-7cell line

| **Sample**  **conc. (µg/ml)** | ***C. viminale*** | | | | | ***P. daemia*** | | | | |
| --- | --- | --- | --- | --- | --- | --- | --- | --- | --- | --- |
| **3 Readings** | | | **Mean** | **S.D. (±)** | **3 Readings** | | | **Mean** | **S.D. (±)** |
|  | ***C. viminale*** | | | | | ***P. daemia*** | | | | |
| **500** | **15.23** | **14.59** | **12.87** | **14.23** | **85.77** | **17.08** | **18.23** | **15.41** | **16.91** | **83.09** |
| **250** | **26.15** | **30.63** | **28.94** | **28.57** | **71.43** | **29.74** | **31.7** | **30.89** | **30.78** | **69.22** |
| **125** | **44.87** | **42.76** | **41.53** | **43.05** | **56.95** | **48.16** | **49.08** | **45.27** | **47.50** | **52.50** |
| **62.5** | **75.34** | **76.08** | **72.19** | **74.54** | **25.46** | **79.51** | **85.16** | **78.27** | **80.98** | **19.02** |
| **31.25** | **91.38** | **90.54** | **90.54** | **90.82** | **9.18** | **96.2** | **96.2** | **90.68** | **94.36** | **5.64** |
| **15.6** | **96.4** | **97.63** | **98.12** | **97.38** | **2.62** | **98.79** | **99.14** | **98.79** | **98.91** | **1.09** |
| **7.8** | **99.54** | **99.54** | **100** | **99.69** | **0.31** | **100** | **100** | **100** | **100** | **0** |
| **3.9** | **100** | **100** | **100** | **100** | **0** | **100** | **100** | **100** | **100** | **0** |
| **2** | **100** | **100** | **100** | **100** | **0** | **100** | **100** | **100** | **100** | **0** |
| **1** | **100** | **100** | **100** | **100** | **0** | **100** | **100** | **100** | **100** | **0** |
| **0.5** | **100** | **100** | **100** | **100** | **0** | **100** | **100** | **100** | **100** | **0** |
| **0.25** | **100** | **100** | **100** | **100** | **0** | **100** | **100** | **100** | **100** | **0** |
| **0** | **100** | **100** | **100** | **100** | **0** | **100** | **100** | **100** | **100** | **0** |
|  | **IC50** | | | | | **IC50** | | | | |
|  | **114.48** | **111.42** | **107.73** | **111.21** | **3.38** | **121.33** | **123.41** | **116.04** | **120.26** | **3.80** |

Table S-7: Evaluation of antioxidant of *alkaloid and phenolic composition of C. viminale and P. daemia methanol extracts*

cytotoxicity against HCT-116 cell line

| **Sample**  **conc. (µg/ml)** | ***C. viminale*** | | | | | ***P. daemia*** | | | | |
| --- | --- | --- | --- | --- | --- | --- | --- | --- | --- | --- |
| **3 Readings** | | | **Mean** | **S.D. (±)** | **3 Readings** | | | **Mean** | **S.D. (±)** |
|  | ***C. viminale*** | | | | | ***P. daemia*** | | | | |
| **500** | **5.26** | **4.75** | **6.29** | **5.43** | **94.57** | **7.96** | **9.85** | **8.13** | **8.65** | **91.35** |
| **250** | **11.48** | **15.29** | **13.04** | **13.27** | **86.73** | **17.42** | **19.64** | **20.56** | **19.21** | **80.79** |
| **125** | **26.13** | **29.76** | **25.42** | **27.10** | **72.90** | **31.75** | **33.29** | **34.08** | **33.04** | **66.96** |
| **62.5** | **39.56** | **42.08** | **36.91** | **39.52** | **60.48** | **65.49** | **64.86** | **69.17** | **66.51** | **33.49** |
| **31.25** | **61.34** | **65.29** | **64.83** | **63.82** | **36.18** | **87.13** | **85.26** | **90.54** | **87.64** | **12.36** |
| **15.6** | **85.09** | **86.41** | **86.41** | **85.97** | **14.03** | **98.06** | **98.06** | **99.74** | **98.62** | **1.38** |
| **7.8** | **97.41** | **95.23** | **96.74** | **96.46** | **3.54** | **100** | **100** | **100** | **100** | **0** |
| **3.9** | **99.54** | **99.54** | **98.62** | **99.23** | **0.77** | **100** | **100** | **100** | **100** | **0** |
| **2** | **100** | **100** | **100** | **100** | **0** | **100** | **100** | **100** | **100** | **0** |
| **1** | **100** | **100** | **100** | **100** | **0** | **100** | **100** | **100** | **100** | **0** |
| **0.5** | **100** | **100** | **100** | **100** | **0** | **100** | **100** | **100** | **100** | **0** |
| **0.25** | **100** | **100** | **100** | **100** | **0** | **100** | **100** | **100** | **100** | **0** |
| **0** | **100** | **100** | **100** | **100** | **0** | **100** | **100** | **100** | **100** | **0** |
|  | **IC50** | | | | | **IC50** | | | | |
|  | **47.52** | **51.84** | **47.85** | **49.07** | **2.40** | **91.19** | **91.92** | **96.64** | **93.25** | **2.96** |

Table S-8: Evaluation of antioxidant of *alkaloid and phenolic composition of C. viminale and P. daemia methanol extracts*

cytotoxicity against A-549 cell line

| **Sample**  **conc. (µg/ml)** | ***C. viminale*** | | | | | ***P. daemia*** | | | | |
| --- | --- | --- | --- | --- | --- | --- | --- | --- | --- | --- |
| **3 Readings** | | | **Mean** | **S.D. (±)** | **3 Readings** | | | **Mean** | **S.D. (±)** |
|  | ***C. viminale*** | | | | | ***P. daemia*** | | | | |
| **500** | **5.34** | **6.08** | **4.95** | **5.46** | **94.54** | **12.08** | **14.56** | **13.24** | **13.29** | **86.71** |
| **250** | **11.27** | **12.59** | **10.34** | **11.40** | **88.60** | **24.65** | **31.42** | **29.13** | **28.40** | **71.60** |
| **125** | **19.41** | **20.73** | **18.62** | **19.59** | **80.41** | **43.76** | **40.94** | **47.38** | **44.03** | **55.97** |
| **62.5** | **32.56** | **32.56** | **30.79** | **31.97** | **68.03** | **68.49** | **65.13** | **70.88** | **68.17** | **31.83** |
| **31.25** | **46.93** | **44.81** | **42.06** | **44.60** | **55.40** | **83.15** | **80.42** | **81.79** | **81.79** | **18.21** |
| **15.6** | **67.52** | **64.23** | **60.87** | **64.21** | **35.79** | **94.08** | **90.67** | **91.85** | **92.20** | **7.80** |
| **7.8** | **81.47** | **80.95** | **82.76** | **81.73** | **18.27** | **99.27** | **98.63** | **97.94** | **98.61** | **1.39** |
| **3.9** | **90.68** | **90.68** | **92.43** | **91.26** | **8.74** | **100** | **100** | **100** | **100** | **0** |
| **2** | **98.13** | **97.46** | **98.13** | **97.91** | **2.09** | **100** | **100** | **100** | **100** | **0** |
| **1** | **100** | **100** | **100** | **100** | **0** | **100** | **100** | **100** | **100** | **0** |
| **0.5** | **100** | **100** | **100** | **100** | **0** | **100** | **100** | **100** | **100** | **0** |
| **0.25** | **100** | **100** | **100** | **100** | **0** | **100** | **100** | **100** | **100** | **0** |
| **0** | **100** | **100** | **100** | **100** | **0** | **100** | **100** | **100** | **100** | **0** |
|  | **IC50** | | | | | **IC50** | | | | |
|  | **28.87** | **27.03** | **24.61** | **26.84** | **2.14** | **109.23** | **101.59** | **118.03** | **109.62** | **8.23** |

Table S-8: Evaluation of antioxidant of *alkaloid and phenolic composition of C. viminale and P. daemia methanol extracts*

cytotoxicity against PC-3 cell line

| **Sample**  **conc. (µg/ml)** | ***C. viminale*** | | | | | ***P. daemia*** | | | | |
| --- | --- | --- | --- | --- | --- | --- | --- | --- | --- | --- |
| **3 Readings** | | | **Mean** | **S.D. (±)** | **3 Readings** | | | **Mean** | **S.D. (±)** |
|  | ***C. viminale*** | | | | | ***P. daemia*** | | | | |
| **500** | **6.79** | **7.34** | **5.98** | **6.70** | **93.30** | **10.83** | **12.74** | **13.81** | **12.46** | **87.54** |
| **250** | **14.58** | **16.02** | **12.73** | **14.44** | **85.56** | **26.74** | **28.65** | **27.09** | **27.49** | **72.51** |
| **125** | **30.67** | **30.67** | **29.49** | **30.28** | **69.72** | **39.57** | **42.13** | **40.64** | **40.78** | **59.22** |
| **62.5** | **46.82** | **43.17** | **44.96** | **44.98** | **55.02** | **90.63** | **87.65** | **86.21** | **88.16** | **11.84** |
| **31.25** | **69.45** | **78.94** | **72.13** | **73.51** | **26.49** | **99.46** | **98.74** | **98.74** | **98.98** | **1.02** |
| **15.6** | **81.56** | **88.07** | **88.07** | **85.90** | **14.10** | **100** | **100** | **100** | **100** | **0** |
| **7.8** | **92.73** | **96.31** | **95.28** | **94.77** | **5.23** | **100** | **100** | **100** | **100** | **0** |
| **3.9** | **98.71** | **99.25** | **98.71** | **98.89** | **1.11** | **100** | **100** | **100** | **100** | **0** |
| **2** | **100** | **100** | **100** | **100** | **0** | **100** | **100** | **100** | **100** | **0** |
| **1** | **100** | **100** | **100** | **100** | **0** | **100** | **100** | **100** | **100** | **0** |
| **0.5** | **100** | **100** | **100** | **100** | **0** | **100** | **100** | **100** | **100** | **0** |
| **0.25** | **100** | **100** | **100** | **100** | **0** | **100** | **100** | **100** | **100** | **0** |
| **0** | **100** | **100** | **100** | **100** | **0** | **100** | **100** | **100** | **100** | **0** |
|  | **IC50** | | | | | **IC50** | | | | |
|  | **58.11** | **56.53** | **56.70** | **57.11** | **0.86** | **112.23** | **114.19** | **112.16** | **112.86** | **1.15** |

Table S-10: Evaluation of antioxidant of *alkaloid and phenolic composition of C. viminale and P. daemia methanol extracts*

cytotoxicity against A-431 cell line

| **Sample**  **conc. (µg/ml)** | ***C. viminale*** | | | | | ***P. daemia*** | | | | |
| --- | --- | --- | --- | --- | --- | --- | --- | --- | --- | --- |
| **3 Readings** | | | **Mean** | **S.D. (±)** | **3 Readings** | | | **Mean** | **S.D. (±)** |
|  | ***C. viminale*** | | | | | ***P. daemia*** | | | | |
| **500** | **4.85** | **5.23** | **4.51** | **4.86** | **95.14** | **11.89** | **9.75** | **9.75** | **10.46** | **89.54** |
| **250** | **11.24** | **12.75** | **11.43** | **11.81** | **88.19** | **25.43** | **21.89** | **24.12** | **23.81** | **76.19** |
| **125** | **23.47** | **23.47** | **20.64** | **22.53** | **77.47** | **39.05** | **37.41** | **34.69** | **37.05** | **62.95** |
| **62.5** | **37.26** | **36.08** | **38.51** | **37.28** | **62.72** | **60.84** | **54.25** | **57.16** | **57.42** | **42.58** |
| **31.25** | **54.19** | **59.27** | **54.19** | **55.88** | **44.12** | **76.49** | **70.64** | **78.31** | **75.15** | **24.85** |
| **15.6** | **68.34** | **72.13** | **73.08** | **71.18** | **28.82** | **89.06** | **88.42** | **91.74** | **89.74** | **10.26** |
| **7.8** | **83.95** | **86.54** | **88.27** | **86.25** | **13.75** | **97.61** | **98.17** | **98.58** | **98.12** | **1.88** |
| **3.9** | **91.72** | **92.63** | **96.04** | **93.46** | **6.54** | **100** | **100** | **100** | **100** | **0** |
| **2** | **99.46** | **98.17** | **98.63** | **98.75** | **1.25** | **100** | **100** | **100** | **100** | **0** |
| **1** | **100** | **100** | **100** | **100** | **0** | **100** | **100** | **100** | **100** | **0** |
| **0.5** | **100** | **100** | **100** | **100** | **0** | **100** | **100** | **100** | **100** | **0** |
| **0.25** | **100** | **100** | **100** | **100** | **0** | **100** | **100** | **100** | **100** | **0** |
| **0** | **100** | **100** | **100** | **100** | **0** | **100** | **100** | **100** | **100** | **0** |
|  | **IC50** | | | | | **IC50** | | | | |
|  | **38.98** | **43.74** | **39.60** | **40.78** | **2.59** | **93.59** | **78.27** | **82.42** | **84.76** | **7.92** |

Table S-10: Evaluation of antioxidant of *alkaloid and phenolic composition of C. viminale and P. daemia methanol extracts*

cytotoxicity against **MRC-5** cell line

| **Sample**  **conc. (µg/ml)** | **3 Readings** | | | **Mean** | **S.D. (±)** | **3 Readings** | | | **Mean** | **S.D. (±)** |
| --- | --- | --- | --- | --- | --- | --- | --- | --- | --- | --- |
|  | ***C. viminale*** | | | | | ***P. daemia*** | | | | |
| **500** | **4.85** | **5.23** | **4.51** | **4.86** | **95.14** | **21.78** | **30.64** | **27.08** | **26.50** | **73.50** |
| **250** | **11.24** | **12.75** | **11.43** | **11.81** | **88.19** | **48.19** | **49.06** | **45.23** | **47.49** | **52.51** |
| **125** | **23.47** | **23.47** | **20.64** | **22.53** | **77.47** | **85.02** | **91.43** | **88.92** | **88.46** | **11.54** |
| **62.5** | **37.26** | **36.08** | **38.51** | **37.28** | **62.72** | **97.16** | **99.68** | **98.46** | **98.43** | **1.57** |
| **31.25** | **54.19** | **59.27** | **54.19** | **55.88** | **44.12** | **100** | **100** | **100** | **100** | **0** |
| **15.6** | **68.34** | **72.13** | **73.08** | **71.18** | **28.82** | **100** | **100** | **100** | **100** | **0** |
| **7.8** | **83.95** | **86.54** | **88.27** | **86.25** | **13.75** | **100** | **100** | **100** | **100** | **0** |
| **3.9** | **91.72** | **92.63** | **96.04** | **93.46** | **6.54** | **100** | **100** | **100** | **100** | **0** |
| **2** | **99.46** | **98.17** | **98.63** | **98.75** | **1.25** | **100** | **100** | **100** | **100** | **0** |
| **1** | **100** | **100** | **100** | **100** | **0** | **100** | **100** | **100** | **100** | **0** |
| **0.5** | **100** | **100** | **100** | **100** | **0** | **100** | **100** | **100** | **100** | **0** |
| **0.25** | **100** | **100** | **100** | **100** | **0** | **100** | **100** | **100** | **100** | **0** |
| **0** | **100** | **100** | **100** | **100** | **0** | **100** | **100** | **100** | **100** | **0** |
|  | **IC50** | | | | | **IC50** | | | | |
|  | **38.98** | **43.74** | **39.60** | **40.78** | **2.59** | **243.86** | **247.23** | **236.35** | **242.48** | **5.57** |
